# Supplementary material for: Prevalence of Conscientious Objection Policies to Harmful Animal Use in Education at Medical and Veterinary Faculties in Europe
Source: MDPI journal article supplement (doi:10.3390/higheredu2020019), 2023-05-05
Supplement: s1 [file s1]

**Table S1:** Number of medical or veterinary faculties or schools assessed in the 27 EU Member States and Switzerland

| COUNTRY                                  | NUMBER OF FACULTIES ASSESSED |
|------------------------------------------|------------------------------|
| <b>Austria</b>                           | <b>9</b>                     |
| Danube Private University                | 1                            |
| Johannes Kepler University Linz          | 1                            |
| Karl Landsteiner University              | 1                            |
| Medical University of Graz               | 1                            |
| Medical University of Innsbruck          | 1                            |
| Medical University of Vienna             | 1                            |
| Paracelsus Medical University            | 1                            |
| Sigmund Freud University                 | 1                            |
| University of Veterinary Medicine Vienna | 1                            |
| <b>Belgium</b>                           | <b>14</b>                    |
| Hasselt University                       | 1                            |
| KU Leuven                                | 1                            |
| Université libre de Bruxelles            | 2                            |
| University of Antwerp                    | 1                            |
| University of Ghent                      | 2                            |
| University of Liege                      | 2                            |
| University of Louvain                    | 2                            |
| University of Mons                       | 1                            |
| University of Namur                      | 1                            |
| Vrije Universiteit Brussel               | 1                            |
| <b>Bulgaria</b>                          | <b>8</b>                     |
| Medical University of Sofia              | 1                            |
| Medical University of Varna              | 1                            |
| Medical University Pleven                | 1                            |
| Plovdiv Medical University               | 1                            |
| Sofia University                         | 1                            |
| Trakia University                        | 2                            |
| University of Forestry                   | 1                            |
| <b>Croatia</b>                           | <b>6</b>                     |
| Juraj Dobrila University of Pula         | 1                            |
| University of Osijek                     | 1                            |
| University of Rijeka                     | 1                            |
| University of Split                      | 1                            |
| University of Zagreb                     | 2                            |
| <b>Cyprus</b>                            | <b>10</b>                    |
| Cyprus International University          | 1                            |
| Eastern Mediterranean University         | 1                            |
| European University Cyprus               | 1                            |
| Girne American University                | 1                            |
| Near East University                     | 2                            |
| University of Cyprus                     | 1                            |
| University of Kyrenia                    | 1                            |
| University of Nicosia                    | 2                            |
| <b>Czech Republic</b>                    | <b>9</b>                     |
| Charles University                       | 5                            |
| Masaryk University                       | 1                            |
| Palacký University Olomouc               | 1                            |
| University of Ostrava                    | 1                            |
| University of Veterinary Sciences Brno   | 1                            |
| <b>Denmark</b>                           | <b>5</b>                     |
| Aarhus University                        | 2                            |
| University of Copenhagen                 | 2                            |
| University of Southern Denmark           | 1                            |
| <b>Estonia</b>                           | <b>2</b>                     |
| Estonian University of Life Sciences     | 1                            |
| University of Tartu                      | 1                            |
| <b>Finland</b>                           | <b>6</b>                     |
| Tampere University                       | 1                            |
| University of Eastern Finland            | 1                            |
| University of Helsinki                   | 2                            |
| University of Oulu                       | 1                            |
| University of Turku                      | 1                            |
| <b>France</b>                            | <b>28</b>                    |
| Claude Bernard University Lyon 1-Est     | 1                            |
| Claude Bernard University Lyon 1-Sud     | 1                            |
| Grenoble Alpes University                | 1                            |
| Jean Monnet University                   | 1                            |
| National Veterinary School of Alfort     | 1                            |

|                                                        |           |
|--------------------------------------------------------|-----------|
| National Veterinary School of Toulouse                 | 1         |
| Oniris (National Veterinary, Agrifood and Food School) | 1         |
| Paris-East Créteil University                          | 1         |
| Paris-Saclay University                                | 1         |
| Sorbonne University                                    | 1         |
| Toulouse III - Paul Sabatier University                | 1         |
| Université Paris Cité                                  | 1         |
| University of Angers                                   | 1         |
| University of Bordeaux                                 | 1         |
| University of Burgundy                                 | 1         |
| University of Caen Normandy                            | 1         |
| University of Franche-Comté                            | 1         |
| University of Lille                                    | 1         |
| University of Limoges                                  | 1         |
| University of Montpellier                              | 1         |
| University of Nantes                                   | 1         |
| University of Picardy Jules Verne                      | 1         |
| University of Poitiers                                 | 1         |
| University of Reims Champagne-Ardenne                  | 1         |
| University of Rennes 1                                 | 1         |
| University of Strasbourg                               | 1         |
| University of Tours                                    | 1         |
| University of Versailles Saint-Quentin-en-Yvelines     | 1         |
| <b>Germany</b>                                         | <b>40</b> |
| Bielefeld University                                   | 1         |
| Charite - University Medicine Berlin                   | 1         |
| Christian-Albrecht University of Kiel                  | 1         |
| Free University of Berlin                              | 1         |
| Friedrich Schiller University Jena                     | 1         |
| Friedrich-Alexander University of Erlangen–Nuremberg   | 1         |
| Georgia-Augusta University of Göttingen                | 1         |
| Goethe University Frankfurt                            | 1         |
| Hannover Medical School                                | 1         |
| Heidelberg University                                  | 1         |
| Heinrich Heine University Düsseldorf                   | 1         |
| Johannes Gutenberg University of Mainz                 | 1         |
| Julius-Maximilians University of Würzburg              | 1         |
| Justus-Liebig University of Giessen                    | 2         |
| Ludwigs-Maximilians University of Munich               | 1         |
| Martin Luther University of Halle-Wittenberg           | 1         |
| Otto von Guericke University Magdeburg                 | 1         |
| Philipps University of Marburg                         | 1         |
| Ruhr University Bochum                                 | 1         |
| RWTH Aachen University                                 | 1         |
| Saarland University                                    | 1         |
| Technical University of Munich                         | 1         |
| TU Dresden                                             | 1         |
| University of Augsburg                                 | 1         |
| University of Bonn                                     | 1         |
| University of Cologne                                  | 1         |
| University of Duisburg-Essen                           | 1         |
| University of Freiburg                                 | 1         |
| University of Greifswald                               | 1         |
| University of Hamburg                                  | 1         |
| University of Leipzig                                  | 1         |
| University of Lübeck                                   | 1         |
| University of Oldenburg                                | 1         |
| University of Regensburg                               | 1         |
| University of Rostock                                  | 1         |
| University of Tübingen                                 | 1         |
| University of Ulm                                      | 1         |
| University of Veterinary Medicine Hannover             | 1         |
| Westphalian University of Münster                      | 1         |
| <b>Greece</b>                                          | <b>9</b>  |
| Aristotle University of Thessaloniki                   | 2         |
| Democritus University of Thrace                        | 1         |
| National and Kapodistrian University of Athens         | 1         |
| University of Crete                                    | 1         |
| University of Ioannina                                 | 1         |
| University of Patras                                   | 1         |
| University of Thessaly                                 | 2         |
| <b>Hungary</b>                                         | <b>5</b>  |
| Semmelweis University                                  | 1         |

|                                                                        |           |
|------------------------------------------------------------------------|-----------|
| University of Debrecen                                                 | 1         |
| University of Pécs                                                     | 1         |
| University of Szeged                                                   | 1         |
| University of Veterinary Medicine Budapest                             | 1         |
| <b>Ireland</b>                                                         | <b>7</b>  |
| NUI Galway                                                             | 1         |
| Royal College of Surgeons in Ireland                                   | 1         |
| Trinity College Dublin                                                 | 1         |
| University College Cork                                                | 1         |
| University College Dublin                                              | 2         |
| University of Limerick                                                 | 1         |
| <b>Italy</b>                                                           | <b>55</b> |
| D'Annunzio University of Chieti–Pescara                                | 1         |
| Humanitas University                                                   | 1         |
| Magna Græcia University                                                | 1         |
| Marche Polytechnic University                                          | 1         |
| Saint Camillus International University of Health and Medical Sciences | 1         |
| Sapienza University of Rome                                            | 3         |
| Università degli Studi della Campania Luigi Vanvitelli                 | 1         |
| University of Bari                                                     | 2         |
| University of Bologna                                                  | 2         |
| University of Brescia                                                  | 1         |
| University of Cagliari                                                 | 1         |
| University of Camerino                                                 | 1         |
| University of Catania                                                  | 1         |
| University of Eastern Piedmont                                         | 1         |
| University of Ferrara                                                  | 1         |
| University of Florence                                                 | 1         |
| University of Foggia                                                   | 1         |
| University of Genoa                                                    | 1         |
| University of Insubria                                                 | 1         |
| University of L'Aquila                                                 | 1         |
| University of Messina                                                  | 2         |
| University of Milan                                                    | 2         |
| University of Milano-Bicocca                                           | 1         |
| University of Modena and Reggio Emilia                                 | 1         |
| University of Molise                                                   | 1         |
| University of Naples Federico II                                       | 2         |
| University of Padua                                                    | 2         |
| University of Palermo                                                  | 1         |
| University of Parma                                                    | 2         |
| University of Pavia                                                    | 1         |
| University of Perugia                                                  | 2         |
| University of Pisa                                                     | 2         |
| University of Rome Tor Vergata                                         | 1         |
| University of Salerno                                                  | 1         |
| University of Sassari                                                  | 2         |
| University of Siena                                                    | 1         |
| University of Teramo                                                   | 1         |
| University of Trento                                                   | 1         |
| University of Trieste                                                  | 1         |
| University of Turin                                                    | 2         |
| University of Udine                                                    | 1         |
| University of Verona                                                   | 1         |
| <b>Latvia</b>                                                          | <b>3</b>  |
| Latvia University of Life Sciences and Technologies                    | 1         |
| Rīga Stradiņš University                                               | 1         |
| University of Latvia                                                   | 1         |
| <b>Lithuania</b>                                                       | <b>3</b>  |
| Lithuanian University of Health Sciences                               | 2         |
| Vilnius University                                                     | 1         |
| <b>Luxembourg</b>                                                      | <b>2</b>  |
| University of Luxembourg                                               | 2         |
| <b>Malta</b>                                                           | <b>1</b>  |
| University of Malta                                                    | 1         |
| <b>Netherlands</b>                                                     | <b>9</b>  |
| Erasmus University Rotterdam                                           | 1         |
| Leiden University                                                      | 1         |
| Maastricht University                                                  | 1         |
| Radboud University Nijmegen                                            | 1         |
| University of Amsterdam                                                | 1         |
| University of Groningen                                                | 1         |
| Utrecht University                                                     | 2         |

|                                                                         |           |
|-------------------------------------------------------------------------|-----------|
| Vrije Universiteit Amsterdam                                            | 1         |
| <b>Poland</b>                                                           | <b>24</b> |
| Cardinal Stefan Wyszyński University in Warsaw                          | 1         |
| Jagiellonian University                                                 | 1         |
| Medical University of Białystok                                         | 1         |
| Medical University of Gdańsk                                            | 1         |
| Medical University of Łódź                                              | 1         |
| Medical University of Lublin                                            | 1         |
| Medical University of Silesia                                           | 1         |
| Medical University of Warsaw                                            | 1         |
| Nicolaus Copernicus University in Toruń                                 | 2         |
| Pomeranian Medical University in Szczecin                               | 1         |
| Poznań University of Medical Sciences                                   | 1         |
| Siedlce University of Natural Sciences and Humanities                   | 1         |
| University of Life Sciences in Lublin                                   | 1         |
| University of Life Sciences in Poznań                                   | 1         |
| University of Opole                                                     | 1         |
| University of Rzeszów                                                   | 1         |
| University of Warmia and Mazury in Olsztyn                              | 2         |
| University of Zielona Góra                                              | 1         |
| Warsaw University of Life Sciences                                      | 2         |
| Wrocław Medical University                                              | 1         |
| Wrocław University of Environmental and Life Sciences                   | 1         |
| <b>Portugal</b>                                                         | <b>14</b> |
| Lusofona University                                                     | 1         |
| NOVA University Lisbon                                                  | 1         |
| University of Algarve                                                   | 1         |
| University of Aveiro                                                    | 1         |
| University of Beira Interior                                            | 1         |
| University of Coimbra                                                   | 1         |
| University of Évora                                                     | 1         |
| University of Lisbon                                                    | 2         |
| University of Minho                                                     | 1         |
| University of Porto                                                     | 2         |
| University of Trás-os-Montes and Alto Douro                             | 1         |
| Vasco da Gama University School                                         | 1         |
| <b>Romania</b>                                                          | <b>13</b> |
| Banat University of Agricultural Sciences and Veterinary Medicine       | 1         |
| Carol Davila University of Medicine and Pharmacy                        | 1         |
| Iași University of Life Sciences                                        | 1         |
| Iuliu Hațieganu University of Medicine and Pharmacy                     | 1         |
| Lucian Blaga University of Sibiu                                        | 1         |
| Ovidius University                                                      | 1         |
| Transilvania University of Braşov                                       | 1         |
| University of Agricultural Sciences and Veterinary Medicine Cluj-Napoca | 1         |
| University of Agronomic Sciences and Veterinary Medicine of Bucharest   | 1         |
| University of Medicine and Pharmacy of Craiova                          | 1         |
| University of Medicine, Pharmacy, Science and Technology of Târgu Mureş | 1         |
| University of Oradea                                                    | 1         |
| Victor Babeş University of Medicine and Pharmacy                        | 1         |
| <b>Slovakia</b>                                                         | <b>4</b>  |
| Comenius University                                                     | 1         |
| Pavol Jozef Šafárik University                                          | 1         |
| Slovak Medical University                                               | 1         |
| University of Veterinary Medicine and Pharmacy in Košice                | 1         |
| <b>Slovenia</b>                                                         | <b>3</b>  |
| University of Ljubljana                                                 | 2         |
| University of Maribor                                                   | 1         |
| <b>Spain</b>                                                            | <b>41</b> |
| Alfonso X El Sabio University                                           | 1         |
| Autonomous University of Barcelona                                      | 2         |
| CEU Cardenal Herrera University                                         | 1         |
| Complutense University of Madrid                                        | 2         |
| Miguel Hernández University of Elche                                    | 1         |
| University of Alcalá                                                    | 1         |
| University of Almería                                                   | 1         |
| University of Barcelona                                                 | 1         |
| University of Cádiz                                                     | 1         |
| University of Cantabria                                                 | 1         |
| University of Castilla–La Mancha                                        | 1         |
| University of Córdoba                                                   | 2         |
| University of Deusto                                                    | 1         |
| University of Extremadura                                               | 2         |

|                                                     |           |
|-----------------------------------------------------|-----------|
| University of Girona                                | 1         |
| University of Granada                               | 1         |
| University of Jaén                                  | 1         |
| University of La Laguna                             | 1         |
| University of Las Palmas de Gran Canaria            | 1         |
| University of León                                  | 1         |
| University of Lleida                                | 1         |
| University of Málaga                                | 1         |
| University of Murcia                                | 2         |
| University of Navarra                               | 1         |
| University of Rovira i Virgili                      | 1         |
| University of Salamanca                             | 1         |
| University of Santiago de Compostela                | 2         |
| University of Seville                               | 1         |
| University of the Balearic Islands                  | 1         |
| University of the Basque Country                    | 1         |
| University of Valencia                              | 1         |
| University of Vic - Central University of Catalonia | 1         |
| University of Zaragoza                              | 2         |
| Valencia Catholic University Saint Vincent Martyr   | 1         |
| <b>Sweden</b>                                       | <b>8</b>  |
| Karolinska Institute                                | 1         |
| Linköping University                                | 1         |
| Lund University                                     | 1         |
| Örebro University                                   | 1         |
| Swedish University of Agricultural Sciences         | 1         |
| Umeå University                                     | 1         |
| University of Gothenburg                            | 1         |
| Uppsala University                                  | 1         |
| <b>Switzerland</b>                                  | <b>10</b> |
| University of Basel                                 | 1         |
| University of Bern                                  | 2         |
| University of Fribourg                              | 1         |
| University of Geneva                                | 1         |
| University of Lausanne                              | 1         |
| University of Lucerne                               | 1         |
| University of Lugano                                | 1         |
| University of Zurich                                | 2         |
